# Supplementary material for: Molten Salt Synthesis of Micro-Sized Hexagonally Shaped REMnO3 (RE = Y, Er, Tm, Yb)
Source: MDPI journal article supplement (doi:10.3390/inorganics11050178), 2023-04-23
Supplement: s1 [file s1]

## Supporting information

# Molten salt synthesis of micro-sized hexagonally shaped $\text{REMnO}_3$ ( $\text{RE} = \text{Y}, \text{Er}, \text{Tm}, \text{Yb}$ )

Dovydas Karoblis<sup>1</sup>, Aleksej Zarkov<sup>1,\*</sup>, Tomas Murauskas<sup>1</sup>, Aivaras Kareiva<sup>1</sup>

<sup>1</sup>*Institute of Chemistry, Vilnius University, Naugarduko 24, LT-03225 Vilnius, Lithuania*

\*Author to whom correspondence should be addressed.

Aleksej Zarkov: e-mail: aleksej.zarkov@chf.vu.lt

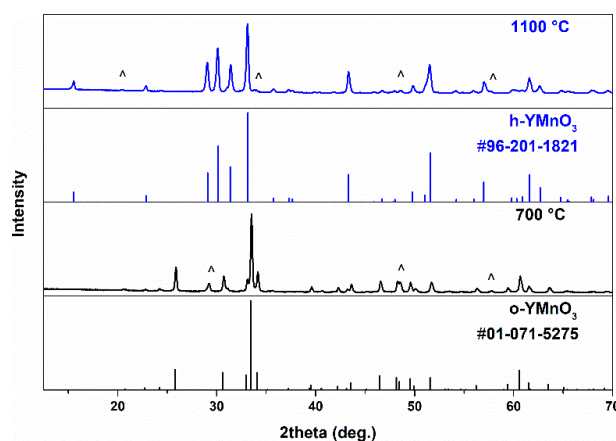

Figure S1. XRD patterns of  $\text{YMnO}_3$  prepared by using oxides as starting material. ^ represents the  $\text{Y}_2\text{O}_3$  phase.

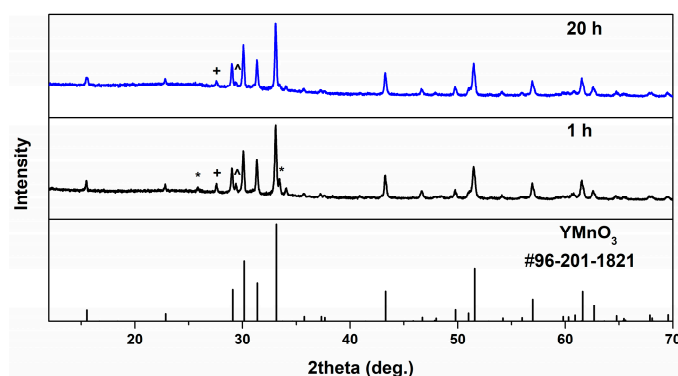

Figure S2. XRD patterns of  $\text{YMnO}_3$  prepared at  $900\text{ }^\circ\text{C}$  with different reaction times. ^ represents the  $\text{Y}_2\text{O}_3$  phase, + -  $\text{MnO}_2$  phase, while \* - o- $\text{YMnO}_3$  phase.
